# Supplementary material for: Genetic Variation and Its Reflection on Posttranslational Modifications in Frequency Clock and Mating Type a-1 Proteins in Sordaria fimicola
Source: Biomed Res Int. 2017 Jun 21;2017:1268623. doi: 10.1155/2017/1268623 (PMC5499255; doi:10.1155/2017/1268623)
Supplement: Supplementary file 1 — Supplementary Table 1: List of Parental Strains and their F1 generation used for evaluation of potential SSR markers for S. fimicola collected from two contrasting slopes SFS and NFS of EC. Supplementary Table 2: List of primers for the amplification of Frequency Clock and mating type 1 genes in Sordaria fimicola. Supplementary Table 3: List of SSR primers used for Sordaria fimicola. Supplementary Figure 1: WebSat output for finding SSRs and for the design of primer pair 266426263-F and 266426263-R to amplify the (CT)7 microsatellite locus. Supplementary Figure 2: Prediction of O-beta-Glycosylation in Neurospora crassa. Supplementary Figure 3: Prediction of O-beta-Glycosylation in Sordaria fimicola. Supplementary Figure 4: Multiple sequence Alignment of frequency clock protein between Sordaria fimicola and Neurospora crassa. [file 1268623.f1.docx]

**Supplementry Material**

**Supplementary Table 1:** List of Parental Strains and their F1 generation used for evaluation of potential SSR markers for S*. fimicola* collected from two contrasting slopes SFS and NFS of EC

| Sr. no. | S2 | S3 | N6 | N5 | SW 92.1 |
| --- | --- | --- | --- | --- | --- |
|  | RS2 34.6 | RS3 04.2 | RN6 17.2 | RN5 06.5 | RSW 80.1 |
|  | RS2 69.1 | RS3 42.3 | RN6 10.5 | RN5 10.7 | RSW 76.2 |
|  | RS2 22.2 | RS3 06.3 | RN6 30.1 | RN5 15.5 | RSW 66.5 |
|  | RS2 11.3 | RS3 14.5 | RN6 54.5 | RN5 27.4 | RSW 60.7 |
|  | RS2 46.4 | RS3 27.6 | RN6 56.8 | RN5 42.3 | RSW 90.3 |
|  | RS2 40.1 | RS3 09.2 | RN6 61.3 | RN5 19.6 | RSW 92.5 |
|  | RS2 56.8 | RS3 15.7 | RN6 70.7 | RN5 07.8 | RSW 43.8 |
|  | RS2 86.7 | RS3 21.8 | RN6 80.4 | RN5 20.2 | RSW 50.5 |
|  | RS2 71.5 | RS3 31.5 | RN6 33.7 | RN5 04.1 | RSW 87.1 |
|  | RS2 11.6 | RS3 36.1 | RN6 46.2 | RN5 05.5 | RSW 89.3 |

RS, RN, RSw, indicating progeny raised by Rabia from a single spore of original Strains of S2, S3, N5 N6 S3, SW 92.1. RS2 (F1 generation of S2), RS3 (F1 generation of S3), RN5 (F1 generation of N5), RN6 (F1 generation of N6) and RSW (F1 generation of SW 92.1). First number indicated octade number, full stop and second number referred position of spore in an ascus. For initial screening only eight parental strains (S1, S2, S3, N5, N6, N7, Sw17.2 and Sw92.1) were used. Sw stands for Sordaria white mutants.

**Supplementary Table 2:** List of primers for the amplification of Frequency Clock and mating type 1 genes in *Sordaria fimicola*

| Freq_F1 | AGCTCAAGATACTTTGGGTCG |
| --- | --- |
| Freq_R1 | CCCGACACGACTCGATAAATTTGA |
| Freq_F2 | ATAGGAACAAGACCGGCTGC |
| Freq_R2 | TGAGACGGATGAGGTTGTGC |
| mat_a1_F | CAGAAGAAGAAGGCCAAGATTCCTC |
| mat-a1-R | ATTGTAGCGATAGTCGGGATTGTCC |

**Supplementary Table 3:** List of SSR primers used for *Sordaria fimicola*

| Primer | Forward | Reverse | SSR | Repeat | Expected product (bp) | SSR found |
| --- | --- | --- | --- | --- | --- | --- |
| 266426263 | ACTTGCGGTACCTGTATTCCCAT | ATGAGACCAATGTCGATGAATG | CT | 7 | 249 | Yes |
| 240247748 | CCGTCTGAATGAGTTTCTGTTG | CATAGAGGTAGGTTTTCACCGCT | TCC | 6 | 353 | Yes |
| **226885242** | AGTGGGATTTACACGTTCTGCT | CCCTGATGCTGTTCCTATTGAT | AC | 7 | 351 | Yes |
| **226815604** | CGTCAATCAGAAATCTTCGCGTC | GGCCCATCTTTCAAGTCTCA | CCA | 6 | 350 | Yes |
| **146327844** | CCCTTCCTCTTTTCTCTCCATT | TTGACCTTTCTCTTCCTTGCTC | CAT | 8 | 398 | Yes |
| **193227756** | ATTCAAGCTGCATCATCATCAC | CTCTATGTAGTATGCTCCCCGC | CAT | 8 | 337 | Yes |
| **164510147** | TTAGTCAAGAGAGACCGGACCAT | GAGTTGGAGTTGAAGTTGAGGG | CGA | 6 | 363 | Yes |
| **164510145** | CAACATTGAGCCAAAGGAAGAT | CTCAGGGGTGAAGAAGGTAATG | CAT | 12 | 373 | No |
| **110566586** | AGAATCCAGAAGAGACGAGACG | AAGTGGAAAGTGGCTGAAAGAG | TCCC | 6 | 387 | No |
| **8218219** | AACACAACACAAAACAAACGAGC | CTGCCATCAGAGTACACACACA | GAG | 4 | 300 | No |
| **39645990** | CTACAACCTT CCCAAGAACC CT | GAAGAGGGAGCCGGAGAGGC | CAA | 18 | 363 | Yes |
| 336257193 | TCTGGATAGGGGTAGGCGTCTG | GGCTCAACCTGCAATGGACTCT | GTG | 7 | 362 | Yes |
| 336241528 | CCATTCACATCATTCGTGACCC | CGTTTACGCTATGGGCAACACA | TGG | 7 | 350 | Yes |
| 336241251 | AACGACCACGAACGAATCCAAT | GCGCCGTGACAAGTTCTATCAA | AT | 11 | 386 | No |
| 336239778 | ACGACAGCACAACCACTCTTCG | AGATGGAGGAGGAGGAGGAGGA | GAA | 7 | 345 | No |
| 336257403 | ACCCAAGAGGGAGGAAAAGACG | CGTTTACGCTATGGGCAACACA | TTG` | 11 | 363 | Yes |
| 380086584 | AATAGGCTTGGTTCCCGCCTTA | TCGTTCTGACGGAGGCATTAAAA | TA | 6 | 360 | No |
| 380086579 | CGACTAACAGTGGGTGCCAAGA | ATAAAGAGCGAACCGTGAACGC | AT | 8 | 342 | NO |
| 380086569 | GTACCTATGCCCAGCCGCC | AGCTGTCCCAGTTAGGCAGATCA | TTCA | 6 | 387 | NO |
| 380085080 | ACTCCTCCTCCTCCTGCCGA | GCGATCTCCTCTGGACTAAAATTGC | TAA | 6 | 340 | No |


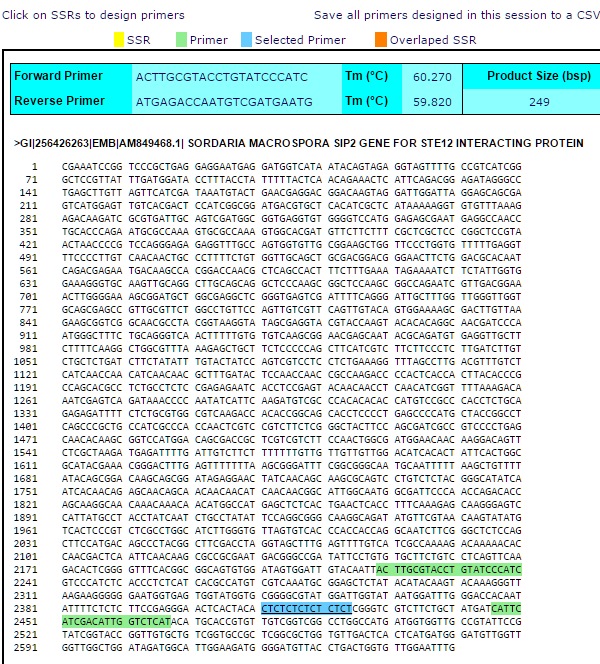


**Supplementary Figure 1**: WebSat output for finding SSRs and for the design of primer pair 266426263-F and 266426263-R to amplify the (CT)7 microsatellite locus.


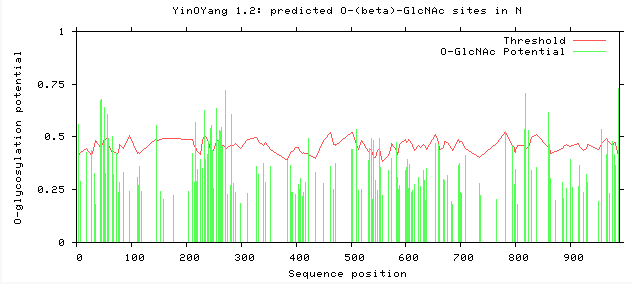


**Supplementary Figure 2: Prediction of O-beta-Glycosylation in Neurospora crassa**


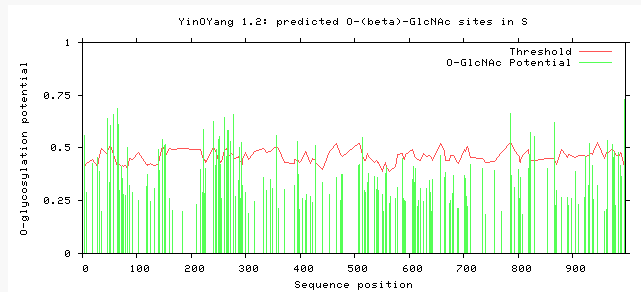


**Supplementary Figure 3: Prediction of O-beta-Glycosylation in Sordaria fimicola**

N MADSGDKSQGMRPPPFDSRGHPLPRRASPDKSITLENHRLARDTSSRVTSSSALGVTESQ 60

S MADSGDKSQGMRPPPFDSRGHPLPRRASPDKSITLHNHRLARDASSRVISSSALGVTGPQ 60

***********************************.*******:**** ******** *

N PQLKSSPTRRNSSG------ESEPTNWFNQSNRNPAAAFHDESHIMEVDPPFYQKETDSS 114

S PQPTSSPTRRDSSGESNDTGQSDPKSWFDQSNRNPVAAFNDESNIMEVDPPFYQKETDSS 120

** .******:*** :*:*..**:******.***:***:****************

N NEESRYPPGRNPVHPPGGVQLPGFRPVAAHSSAADDYRSVIDDLTVENKRLKEELKRYKQ 174

S NEDSRYPPGRNPSYPPRDTQTQGFRATVAHSSSADDFRSVIDDLTVENKRLKEELKRYKQ 180

**:********* :** ..* *** ..****:***:***********************

N FGSDVMRKEKLFEIKVHGLPRRKKRELEATLRDFAASLGDSSESTSQRRKTGRHGTAVHS 234

S FGSDMMRKEKLFEIKVHGLPRRKKRELEATLREFAASLGDSSESTSQRRKAGRHGKAVHS 240

****:***************************:*****************:****.****

N SGVSLSKHDSSSSSRSRPVDSAYNSMSTGRSSHAPHSSGPSLGRPSLTRAKSVGTQKVEN 294

S SGVSLSKHDSSSSSRSRPVDSAYASMSTGRSSHAAHSSGPSLGRPSLSS-KSTSSQKVES 299

*********************** ********** ************: **..:****.

N YLRDTPDGLLPHHIVMTDKEKKKLVVRRLEQLFTGKISGRNMQRNQSMPSMDAPLAPEGT 354

S YLRDTPDGLLPHHVVMTDKEKKKLVVRRLEQLFTGKISGRNMQRIPSIPSMDAALVSEGT 359

*************:****************************** *:***** *. ***

N NMAPPRPPPEGLREACIQLQDGDNPRKNRSSKDNGSASNSGGDQTELGGTGTGSGDGSGS 414

S IMAPPRPPPEGSREACIQLQEGENPEKIRSSKGATSASNSGGDQTEVGGTVTAGGDGNGS 419

********** ********:*:**.* ****. ***********:*** *..***.**

N GGRTGNNTSPPGAIAPDQRPTRPRDLDPDRVQIPSENMDYIRHLGLVSPEFLQGSRTSYQ 474

S GGRTVNNTSPPGVIAPDQRPTRPRDLDPDRVQIPSENMDYIRHLGLVSPEFLQGSRTSYQ 479

**** *******.***********************************************

N DVAPDAEGWVYLNLLCNLAQLHMVNVTPSFIRQAVSEKSTKFQLSADGRKIRWRGGTDGT 534

S DVAPDAEGWVYLNLLCNLAQLHMINVTPSFIRQAVSEKSTKFQLSSDGRKIRWRGGTDGT 539

***********************:*********************:**************

N KFSSDSSEDKSQQSPMTEDTEDGSDKNGRRKKRKTQQASSEIGRFGPSRSPSDTFHYKPM 594

S KFSSDNGEDKSQKSPLTDDTEDGSDKTGRRKKQKTQQARSEIGRLGLSRSPSDTFHYKPM 599

*****..*****:**:*:********.*****:***** *****:* *************

N FVHRNSSSIETSLEESMSQGSEDAVDESNMGNSKWDFSGSGTTQQRRKRRYDGAIVYYTG 654

S FVHCHASSAETSLEESASQGSEDFVDESNLANSKWDFSGSGTTQQRRKRRYDGAIVYYTG 659

*** ::** ******* ****** *****:.*****************************

N APFCTDLSGDPGDMSPTAQMTAGREVEGSGSGDEVEHVLQRTLSGSSLPIRPLSDDRARV 714

S AQFCTDLSGEPGDMSPTEQMTATGEQEASGSGDEAGRVLQRTLSGSSLLVRPLSDDRARV 719

* *******:******* **** * *.******. :*********** :**********

N AEVLDFDPGNPPELVADDGSSPNDEDFVFPWCEDPAKVRIQPIAKEVMEPSGLGGVLPDD 774

S AEALDFDPQNPPDLVSDDGFSPNDEDFVFPWCEDPAKTQVQPLAKEVMGRSGLGGVLPDD 779

**.***** ***:**:*** *****************.::**:***** **********

N HFVMLVTTRRVVRPILQRQLSRSTTSEDTAEFIAERLAAIRTSSPLPP-RSHRLTVAPLQ 833

S HFAIFVTTRRVMRPTLQRHLSRSTTSEDTAEIIAERLASIRTSSPLPPPRSRNLILAPLQ 839

**.::******:** ***:************:******:********* **:.* :****

N VEYVSGQFRRLNPAPLPPPAIFYPPFSTDSSWDDGDDLASDDEEVEEVEEDSYSEGQISR 893

S IEYVAGEFHRLNPASLPPPAMFYPPFSTDSSWDDGDDLVSVEEEVEEMEEESFSEGQMSR 899

:***:*:*:***** *****:*****************.* :*****:**:*:****:**

N RANPHFSDNNTYMRKDDLAFDTETDVRMDSDDN--RLSDSGHNMRAMMPRAEAVDGDDSP 951

S RANPHFSDNNTYMRKEDLAFDTETDVRMDSSHDHRMSSDSGLMMRSVMRRPVAVDGDGSP 959

***************:**************..: **** **::* * *****.**

N LAAVTGKEVDMLHTGSSVATAGGAESGYSSSMEDVSSS 989

S LATVTGRDVDMLHTSSSVATAGGAESGYSSSMEDVSSS 997

**Supplementary Figure 4: Multiple sequence Alignment of frequency clock protein between Sordaria fimicola and Neurospora crassa**

**Supplementary Data file**

**Genomic DNA extraction**

Genomic DNA isolation of *S. fimicola* (for all generations and strains) was done by Modified Pietro method (Pietro *et al*., 1995).

**Material/chemicals Required**

Eppendorf tubes (1.5 ml); Micropipettes, Pestle and Mortar, Vortex, Water bath, Centrifuge machine, Incubator, Liquid nitrogen, Spirit, Choloroform: Isoamyl alcohol (25:24:1), 70% v/v ethanol, Isopropanol, Lysis buffer, Sterile ultrapure water, 2% CTAB buffer, TE buffer

**Lysis buffer**

Lysis buffer is prepared by mixing following 3 buffers:

**BUFFER A**

0.35M sorbitol, 0.1M Tris-HCl pH 9, 5mM EDTA 2.5 vols, of A (5ml)

**BUFFER B**

0.2 M Tris-HCl, pH 9, 2 M NaCl, 2% CTAB, 50 mM EDTA, pH 8, 2.5 vols, of B (2ml)

**BUFFER C**

5% Sarkosyl, 1 vols, of C (2ml)

**Proteinase K**

Buffer A, B and C were mixed and Proteinase K was added to this.

**Procedure**

1. Mycelia (about 10-15mg) from mature petriplates were scraped with the help of sterile needle or spatula and transferred in an eppendorf and let them to freeze at

-200C for overnight.

1. After overnight soaking, sample was transferred to pestle and mortar and crushed by adding liquid nitrogen.
2. 300-500µl of Lysis buffer containing 0.1mg proteinase K was added to crush material to grind the mycelium thoroughly. Crushed material was transferred to eppendorf and vortexed briefly.
3. Eppendorf containing crushed sample was incubated for 1 hour at 650C in a water bath.
4. Centrifuged the eppendorf at 13000g for 15 min. After centrifugation ~600µl of supernatant was shifted to a new eppendorf tube with the help of a micropipette.
5. Proteins were removed from supernatant by sequential extraction using 600µl Phenol: Chloroform: Isoamyl alcohol in a ratio of 25:24:1 v/v. Centrifuged the eppendorf at 13000g for 15 min and then the upper aqueous layer was transferred to a new eppendorf.
6. Aqueous layer was centrifuged at 13000g/ 15 min. by adding Chloroform: Isoamyl alcohol in a ratio of 24:1 v/v.
7. The aqueous supernatant layer ~600 µl was shifted to a new eppendorf; 1 ml of isopropanol was added, mixed thoroughly with the help of vortexer. Eppendorf was incubated at -700 C for 1 hour or overnight at -200 C
8. After incubation eppendorf was centrifuged at 13000g/15 min. Supernatant was drained with micropipette while the pellet was retained.
9. DNA pellet was washed with 150µl of 70% v/v ethanol for two times. Discarded the supernatant layer of ethanol and the pellet was allowed to dry at room temperature.
10. DNA pellet was dissolved in 30-50µl of ultra-sterile, double distilled pure water or in Tris EDTA buffer.
11. DNA pellet was subjected to PCR procedure immediately. Or the solution e.g., DNA was stored at -200 C., if not to use immediately.
